# Supplementary material for: Development of a colorectal cancer diagnostic model and dietary risk assessment through gut microbiome analysis
Source: PubMed Central journal article supplement (PMC6802675; doi:10.1038/s12276-019-0313-4), 2019-10-03

# Supplementary Figure 1

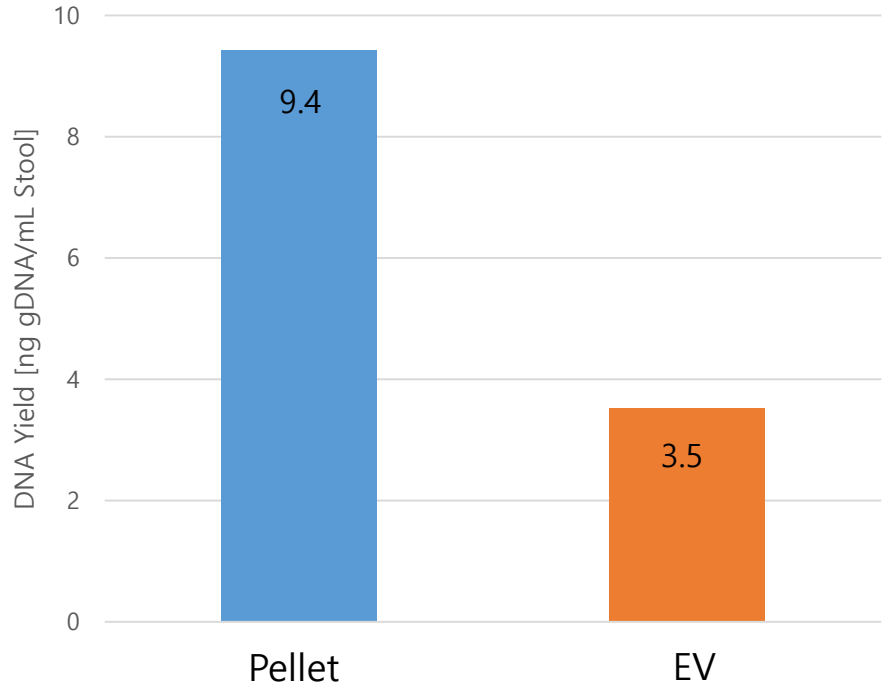

Supplement: 12276_2019_313_MOESM1_ESM.pdf [file 12276_2019_313_MOESM1_ESM.pdf]
